# Supplementary material for: Technical note: Comparison of radiometric techniques for estimating recent organic carbon sequestration rates in inland wetland soils
Source: Copernicus journal article supplement (doi:10.5194/bg-21-4699-2024), 2024-10-30
Supplement: Supplementary file 1 [file bg-21-4699-2024-supplement.pdf]

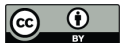

*Supplement of*

## **Technical note: Comparison of radiometric techniques for estimating recent organic carbon sequestration rates in inland wetland soils**

**Purbasha Mistry et al.**

*Correspondence to:* Irena F. Creed ([irena.creed@utoronto.ca](mailto:irena.creed@utoronto.ca))

The copyright of individual parts of the supplement might differ from the article licence.

## Table of Contents

|                                                                                                                                                                                                                                                                                                                                                                                                                                                                                                                                                                                                         |    |
|---------------------------------------------------------------------------------------------------------------------------------------------------------------------------------------------------------------------------------------------------------------------------------------------------------------------------------------------------------------------------------------------------------------------------------------------------------------------------------------------------------------------------------------------------------------------------------------------------------|----|
| <b>Table S1:</b> Summary of physical characteristics of undisturbed wetlands.                                                                                                                                                                                                                                                                                                                                                                                                                                                                                                                           | 3  |
| <b>Table S2:</b> Organic carbon (OC) sequestration rates and their associated classification of 44 sediment cores where both $^{137}\text{Cs}$ and $^{210}\text{Pb}$ profiles were available.                                                                                                                                                                                                                                                                                                                                                                                                           | 4  |
| <b>Figure S1:</b> Depth distributions of high-quality $^{137}\text{Cs}$ ( $\text{Bq kg}^{-1}$ ) and high-quality $^{210}\text{Pb}$ ( $\text{Bq kg}^{-1}$ ) profiles (along with the organic carbon [OC] concentrations [%], cumulative $^{137}\text{Cs}$ inventory [ $\text{Bq m}^{-2}$ ], and linear plot of log-transformed $^{210}\text{Pb}_{\text{ex}}$ against mass depth [ $\text{g cm}^{-2}$ ]) based on their classification. The four depth distribution plots are from sediment cores (a) A-WE-I-W2-T3-CW-R3, (b) S-RO-I-W2-T2-CW-R2, (c) S-LO-I-W3-T2-CW-R2, and (d) S-LO-I-W3-T3-CW-R3.     | 5  |
| <b>Figure S2:</b> Depth distributions of high-quality $^{137}\text{Cs}$ ( $\text{Bq kg}^{-1}$ ) and high-quality $^{210}\text{Pb}$ ( $\text{Bq kg}^{-1}$ ) profiles (along with the organic carbon [OC] concentrations [%], cumulative $^{137}\text{Cs}$ inventory [ $\text{Bq m}^{-2}$ ], and linear plot of log-transformed $^{210}\text{Pb}_{\text{ex}}$ against mass depth [ $\text{g cm}^{-2}$ ]) based on their classification. The four depth distribution plots are from sediment cores (a) S-LO-I-W4-T2-CW-R2, (b) S-RO-I-W5-T1-CW-R1, (c) S-RO-I-W5-T3-CW-R3, and (d) S-RU-I-W7-T1-CW-R1.     | 6  |
| <b>Figure S3:</b> Depth distributions of high-quality $^{137}\text{Cs}$ ( $\text{Bq kg}^{-1}$ ) and high-quality $^{210}\text{Pb}$ ( $\text{Bq kg}^{-1}$ ) profiles (along with the organic carbon [OC] concentrations [%], cumulative $^{137}\text{Cs}$ inventory [ $\text{Bq m}^{-2}$ ], and linear plot of log-transformed $^{210}\text{Pb}_{\text{ex}}$ against mass depth [ $\text{g cm}^{-2}$ ]) based on their classification. The four depth distribution plots are from sediment cores (a) S-RU-I-W7-T2-CW-R2, (b) S-RU-I-W7-T3-CW-R3, (c) S-FO-I-W8-T2-CW-R2, and (d) S-FO-I-W8-T3-CW-R3.     | 7  |
| <b>Figure S4:</b> Depth distributions of high-quality $^{137}\text{Cs}$ ( $\text{Bq kg}^{-1}$ ) and high-quality $^{210}\text{Pb}$ ( $\text{Bq kg}^{-1}$ ) profiles (along with the organic carbon [OC] concentrations [%], cumulative $^{137}\text{Cs}$ inventory [ $\text{Bq m}^{-2}$ ], and linear plot of log-transformed $^{210}\text{Pb}_{\text{ex}}$ against mass depth [ $\text{g cm}^{-2}$ ]) based on their classification. The four depth distribution plots are from sediment cores (a) S-FO-I-W9-T2-CW-R2, (b) S-FO-I-W11-T1-CW-R1, (c) S-FO-I-W11-T2-CW-R2, and (d) S-FO-I-W11-T3-CW-R3.  | 8  |
| <b>Figure S5:</b> Depth distributions of high-quality $^{137}\text{Cs}$ ( $\text{Bq kg}^{-1}$ ) and high-quality $^{210}\text{Pb}$ ( $\text{Bq kg}^{-1}$ ) profiles (along with the organic carbon [OC] concentrations [%], cumulative $^{137}\text{Cs}$ inventory [ $\text{Bq m}^{-2}$ ], and linear plot of log-transformed $^{210}\text{Pb}_{\text{ex}}$ against mass depth [ $\text{g cm}^{-2}$ ]) based on their classification. The four depth distribution plots are from sediment cores (a) S-FO-I-W12-T1-CW-R1, (b) S-FO-I-W12-T3-CW-R3, (c) S-FO-I-W16-T2-CW-R2, and (d) S-FO-I-W16-T3-CW-R3. | 9  |
| <b>Figure S6:</b> Depth distributions of high-quality $^{137}\text{Cs}$ ( $\text{Bq kg}^{-1}$ ) and high-quality $^{210}\text{Pb}$ ( $\text{Bq kg}^{-1}$ ) profiles (along with the organic carbon [OC] concentrations [%], cumulative $^{137}\text{Cs}$ inventory [ $\text{Bq m}^{-2}$ ], and linear plot of log-transformed $^{210}\text{Pb}_{\text{ex}}$ against mass depth [ $\text{g cm}^{-2}$ ]) based on their classification. The four depth distribution plots are from sediment cores (a) M-OA-I-W1-T1-CW-R1, (b) M-OA-I-W1-T2-CW-R2, (c) M-OA-I-W1-T3-CW-R3, and (d) M-OA-I-W2-T1-CW-R1.     | 10 |
| <b>Figure S7:</b> Depth distributions of high-quality $^{137}\text{Cs}$ ( $\text{Bq kg}^{-1}$ ) and high-quality $^{210}\text{Pb}$ ( $\text{Bq kg}^{-1}$ ) profiles (along with the organic carbon [OC] concentrations [%], cumulative $^{137}\text{Cs}$ inventory [ $\text{Bq m}^{-2}$ ], and linear plot of log-transformed $^{210}\text{Pb}_{\text{ex}}$ against mass depth [ $\text{g cm}^{-2}$ ]) based on their classification. The four depth distribution plots are from sediment cores (a) M-OA-I-W4-T1-CW-R1, (b) M-OA-I-W4-T2-CW-R2, (c) O-BR-I-W1-T2-CW-R2, and (d) O-BR-I-W1-T3-CW-R3.     | 11 |

- Figure S8:** Depth distributions of high-quality  $^{137}\text{Cs}$  ( $\text{Bq kg}^{-1}$ ) and high-quality  $^{210}\text{Pb}$  ( $\text{Bq kg}^{-1}$ ) profiles (along with the organic carbon [OC] concentrations [%], cumulative  $^{137}\text{Cs}$  inventory [ $\text{Bq m}^{-2}$ ], and linear plot of log-transformed  $^{210}\text{Pb}_{\text{ex}}$  against mass depth [ $\text{g cm}^{-2}$ ]) based on their classification. The depth distribution plot is from sediment core O-AL-I-W5-T3-CW-R3. 12
- Figure S9:** Depth distributions of high-quality  $^{137}\text{Cs}$  ( $\text{Bq kg}^{-1}$ ) and low-quality  $^{210}\text{Pb}$  ( $\text{Bq kg}^{-1}$ ) profiles (along with the organic carbon [OC] concentrations [%], cumulative  $^{137}\text{Cs}$  inventory [ $\text{Bq m}^{-2}$ ], and linear plot of log-transformed  $^{210}\text{Pb}_{\text{ex}}$  against mass depth [ $\text{g cm}^{-2}$ ]) based on their classification. The four depth distribution plots are from sediment cores (a) S-FO-I-W9-T3-CW-R3, (b) M-OA-I-W3-T2-CW-R2, (c) M-OA-I-W5-T1-CW-R1, and (d) M-OA-I-W5-T3-CW-R3. 13
- Figure S10:** Depth distributions of high-quality  $^{137}\text{Cs}$  ( $\text{Bq kg}^{-1}$ ) and low-quality  $^{210}\text{Pb}$  ( $\text{Bq kg}^{-1}$ ) profiles (along with the organic carbon [OC] concentrations [%], cumulative  $^{137}\text{Cs}$  inventory [ $\text{Bq m}^{-2}$ ], and linear plot of log-transformed  $^{210}\text{Pb}_{\text{ex}}$  against mass depth [ $\text{g cm}^{-2}$ ]) based on their classification. The depth distribution plot is from sediment core O-AL-I-W4-T3-CW-R3. 14
- Figure S11:** Depth distributions of low-quality  $^{137}\text{Cs}$  ( $\text{Bq kg}^{-1}$ ) and high-quality  $^{210}\text{Pb}$  ( $\text{Bq kg}^{-1}$ ) profiles (along with the organic carbon [OC] concentrations [%], cumulative  $^{137}\text{Cs}$  inventory [ $\text{Bq m}^{-2}$ ], and linear plot of log-transformed  $^{210}\text{Pb}_{\text{ex}}$  against mass depth [ $\text{g cm}^{-2}$ ]) based on their classification. The four depth distribution plots are from sediment cores (a) O-BR-I-W2-T2-CW-R2, (b) O-BR-I-W2-T3-CW-R3, (c) O-BR-I-W2-T4-CW-R4, and (d) O-AL-I-W4-T1-CW-R1. 15
- Figure S12:** Depth distributions of low-quality  $^{137}\text{Cs}$  ( $\text{Bq kg}^{-1}$ ) and high-quality  $^{210}\text{Pb}$  ( $\text{Bq kg}^{-1}$ ) profiles (along with the organic carbon [OC] concentrations [%], cumulative  $^{137}\text{Cs}$  inventory [ $\text{Bq m}^{-2}$ ], and linear plot of log-transformed  $^{210}\text{Pb}_{\text{ex}}$  against mass depth [ $\text{g cm}^{-2}$ ]) based on their classification. The two depth distribution plots are from sediment cores (a) O-AL-I-W4-T2-CW-R2 and (b) O-AL-I-W6-T1-CW-R1. 16

**Table S1:** Summary of physical characteristics of undisturbed wetlands.

| Wetland ID                                             | A-WE-I-W1,<br>A-WE-I-W2,<br>A-CA-I-W3   | S-RO-I-W1,<br>S-RO-I-W2,<br>S-LO-I-W3,<br>S-LO-I-W4,<br>S-RO-I-W5,<br>S-RO-I-W6,<br>S-RU-I-W7,<br>S-FO-I-W8,<br>S-FO-I-W9,<br>S-FO-I-W10,<br>S-FO-I-W11,<br>S-FO-I-W12,<br>S-EM-I-W14,<br>S-FO-I-W15,<br>S-FO-I-W16 | M-OA-I-W1,<br>M-OA-I-W2,<br>M-OA-I-W3,<br>M-OA-I-W4,<br>M-OA-I-W5 | O-BR-I-W1,<br>O-BR-I-W2,<br>O-BR-I-W3,<br>O-AL-I-W4,<br>O-AL-I-W5,<br>O-AL-I-W6 |
|--------------------------------------------------------|-----------------------------------------|---------------------------------------------------------------------------------------------------------------------------------------------------------------------------------------------------------------------|-------------------------------------------------------------------|---------------------------------------------------------------------------------|
| Province                                               | Alberta                                 | Saskatchewan                                                                                                                                                                                                        | Manitoba                                                          | Ontario                                                                         |
| Number of wetlands                                     | 3                                       | 16                                                                                                                                                                                                                  | 5                                                                 | 6                                                                               |
| Latitude and longitude                                 | 53.1° to 53.2° N,<br>113.1° to 113.2° W | 51.4° to 51.5° N,<br>103.7° to 106.7° W                                                                                                                                                                             | 50.1° to 50.2° N,<br>100.2° to 100.3° W                           | 43.3° to 45.6° N, 74.8°<br>to 80.3° W                                           |
| Sampling year                                          | 2016                                    | 2019                                                                                                                                                                                                                | 2019                                                              | 2018, 2019                                                                      |
| Mean temperature of the growing season (°C)            | 11                                      | 12.1, 11.7                                                                                                                                                                                                          | 12.4                                                              | 14.3, 13.8                                                                      |
| Mean total annual precipitation of the water year (mm) | 439                                     | 360, 458                                                                                                                                                                                                            | 464                                                               | 892, 997                                                                        |
| Hardiness zone                                         | 3b                                      | 3a - 3b                                                                                                                                                                                                             | 3a                                                                | 5a - 5b                                                                         |
| Proportion of hardiness                                | 1                                       | 1                                                                                                                                                                                                                   | 0.7                                                               | 0.7 - 1                                                                         |
| Soil great group                                       | Black Chernozem                         | Dark Brown Chernozem, Black Chernozem                                                                                                                                                                               | Black Chernozem                                                   | Grey Brown Luvisol, Humic Gleysol                                               |
| Soil texture                                           | Fine                                    | Medium                                                                                                                                                                                                              | Fine                                                              | Coarse, fine                                                                    |
| Local surface form                                     | Hummocky and undulating                 | Hummocky, undulating, and ridged                                                                                                                                                                                    | Hummocky                                                          | Hummocky, level                                                                 |
| Regional slope (%)                                     | 0-9                                     | 0-9                                                                                                                                                                                                                 | 4-9                                                               | 0-15                                                                            |
| Drainage class                                         | Well-drained                            | Well-drained                                                                                                                                                                                                        | Well-drained                                                      | Well- to Poorly-drained                                                         |

**Table S2:** Organic carbon (OC) sequestration rates based on <sup>137</sup>Cs and <sup>210</sup>Pb dating and their associated classification of 44 sediment cores (where both <sup>137</sup>Cs and <sup>210</sup>Pb profiles were available).

| Wetland sediment core ID | Classification of <sup>137</sup> Cs | Classification of <sup>210</sup> Pb | OC sequestration rate since 1954, <sup>137</sup> Cs (Mg ha <sup>-1</sup> yr <sup>-1</sup> ) | OC sequestration rate since 1963, <sup>137</sup> Cs (Mg ha <sup>-1</sup> yr <sup>-1</sup> ) | OC sequestration rate since 1954, <sup>210</sup> Pb (Mg ha <sup>-1</sup> yr <sup>-1</sup> ) | OC sequestration rate since 1963, <sup>210</sup> Pb (Mg ha <sup>-1</sup> yr <sup>-1</sup> ) |
|--------------------------|-------------------------------------|-------------------------------------|---------------------------------------------------------------------------------------------|---------------------------------------------------------------------------------------------|---------------------------------------------------------------------------------------------|---------------------------------------------------------------------------------------------|
| A-WE-I-W2-T3-CW-R3       | High-quality                        | High-quality                        | 1.04                                                                                        | 0.62                                                                                        | 0.80                                                                                        | 0.78                                                                                        |
| S-RO-I-W1-T3-CW-R3       | Low-quality                         | High-quality                        | 0.32                                                                                        | 0.27                                                                                        | 0.31                                                                                        | 0.33                                                                                        |
| S-RO-I-W2-T2-CW-R2       | High-quality                        | High-quality                        | 1.62                                                                                        | 1.38                                                                                        | 0.47                                                                                        | 0.49                                                                                        |
| S-LO-I-W3-T1-CW-R1       | High-quality                        | High-quality                        | 0.64                                                                                        | 0.37                                                                                        | 0.37                                                                                        | 0.40                                                                                        |
| S-LO-I-W3-T2-CW-R2       | High-quality                        | High-quality                        | 0.56                                                                                        | 0.37                                                                                        | 0.45                                                                                        | 0.50                                                                                        |
| S-LO-I-W3-T3-CW-R3       | High-quality                        | High-quality                        | 0.47                                                                                        | 0.34                                                                                        | 0.40                                                                                        | 0.43                                                                                        |
| S-LO-I-W4-T2-CW-R2       | High-quality                        | High-quality                        | 0.93                                                                                        | 0.84                                                                                        | 0.35                                                                                        | 0.36                                                                                        |
| S-RO-I-W5-T1-CW-R1       | High-quality                        | High-quality                        | 0.84                                                                                        | 0.68                                                                                        | 0.80                                                                                        | 0.83                                                                                        |
| S-RO-I-W5-T3-CW-R3       | High-quality                        | High-quality                        | 1.00                                                                                        | 0.75                                                                                        | 0.68                                                                                        | 0.70                                                                                        |
| S-RO-I-W6-T1-CW-R1       | Low-quality                         | Low-quality                         | 0.11                                                                                        | 0.05                                                                                        | 0.69                                                                                        | 0.73                                                                                        |
| S-RU-I-W7-T1-CW-R1       | High-quality                        | High-quality                        | 0.86                                                                                        | 0.55                                                                                        | 0.53                                                                                        | 0.56                                                                                        |
| S-RU-I-W7-T2-CW-R2       | High-quality                        | High-quality                        | 0.57                                                                                        | 0.30                                                                                        | 0.41                                                                                        | 0.43                                                                                        |
| S-RU-I-W7-T3-CW-R3       | High-quality                        | High-quality                        | 0.69                                                                                        | 0.60                                                                                        | 0.54                                                                                        | 0.56                                                                                        |
| S-FO-I-W8-T2-CW-R2       | High-quality                        | High-quality                        | 1.01                                                                                        | 0.83                                                                                        | 0.81                                                                                        | 0.81                                                                                        |
| S-FO-I-W8-T3-CW-R3       | High-quality                        | High-quality                        | 0.88                                                                                        | 0.83                                                                                        | 0.77                                                                                        | 0.77                                                                                        |
| S-FO-I-W9-T2-CW-R2       | High-quality                        | High-quality                        | 0.58                                                                                        | 0.34                                                                                        | 0.34                                                                                        | 0.34                                                                                        |
| S-FO-I-W9-T3-CW-R3       | High-quality                        | Low-quality                         | 0.44                                                                                        | 0.37                                                                                        | 0.60                                                                                        | 0.63                                                                                        |
| S-FO-I-W11-T1-CW-R1      | High-quality                        | High-quality                        | 1.70                                                                                        | 1.57                                                                                        | 1.41                                                                                        | 1.36                                                                                        |
| S-FO-I-W11-T2-CW-R2      | High-quality                        | High-quality                        | 1.31                                                                                        | 1.14                                                                                        | 0.69                                                                                        | 0.71                                                                                        |
| S-FO-I-W11-T3-CW-R3      | High-quality                        | High-quality                        | 1.04                                                                                        | 1.03                                                                                        | 0.95                                                                                        | 0.95                                                                                        |
| S-FO-I-W12-T1-CW-R1      | High-quality                        | High-quality                        | 1.25                                                                                        | 0.65                                                                                        | 1.04                                                                                        | 1.04                                                                                        |
| S-FO-I-W12-T3-CW-R3      | High-quality                        | High-quality                        | 1.16                                                                                        | 0.76                                                                                        | 0.71                                                                                        | 0.71                                                                                        |
| S-FO-I-W16-T2-CW-R2      | High-quality                        | High-quality                        | 0.67                                                                                        | 0.50                                                                                        | 0.59                                                                                        | 0.60                                                                                        |
| S-FO-I-W16-T3-CW-R3      | High-quality                        | High-quality                        | 1.18                                                                                        | 0.38                                                                                        | 0.46                                                                                        | 0.46                                                                                        |
| M-OA-I-W1-T1-CW-R1       | High-quality                        | High-quality                        | 1.60                                                                                        | 0.39                                                                                        | 0.51                                                                                        | 0.53                                                                                        |
| M-OA-I-W1-T2-CW-R2       | High-quality                        | High-quality                        | 1.11                                                                                        | 0.91                                                                                        | 0.97                                                                                        | 1.01                                                                                        |
| M-OA-I-W1-T3-CW-R3       | High-quality                        | High-quality                        | 0.99                                                                                        | 0.50                                                                                        | 0.60                                                                                        | 0.63                                                                                        |
| M-OA-I-W2-T1-CW-R1       | High-quality                        | High-quality                        | 0.98                                                                                        | 0.12                                                                                        | 1.08                                                                                        | 1.15                                                                                        |
| M-OA-I-W3-T2-CW-R2       | High-quality                        | Low-quality                         | 1.16                                                                                        | 0.55                                                                                        | 0.50                                                                                        | 0.52                                                                                        |
| M-OA-I-W4-T1-CW-R1       | High-quality                        | High-quality                        | 0.44                                                                                        | 0.21                                                                                        | 0.34                                                                                        | 0.36                                                                                        |
| M-OA-I-W4-T2-CW-R2       | High-quality                        | High-quality                        | 0.65                                                                                        | 0.45                                                                                        | 0.43                                                                                        | 0.46                                                                                        |
| M-OA-I-W4-T3-CW-R3       | High-quality                        | Low-quality                         | 0.78                                                                                        | 0.06                                                                                        | 0.81                                                                                        | 0.86                                                                                        |
| M-OA-I-W5-T1-CW-R1       | High-quality                        | Low-quality                         | 1.03                                                                                        | 0.26                                                                                        | 0.38                                                                                        | 0.39                                                                                        |
| M-OA-I-W5-T3-CW-R3       | High-quality                        | Low-quality                         | 1.66                                                                                        | 1.55                                                                                        | 1.80                                                                                        | 1.93                                                                                        |
| O-BR-I-W1-T2-CW-R2       | High-quality                        | High-quality                        | 1.22                                                                                        | 0.48                                                                                        | 0.74                                                                                        | 0.74                                                                                        |
| O-BR-I-W1-T3-CW-R3       | High-quality                        | High-quality                        | 1.05                                                                                        | 0.21                                                                                        | 1.03                                                                                        | 1.04                                                                                        |
| O-BR-I-W2-T2-CW-R2       | Low-quality                         | High-quality                        | 0.53                                                                                        | 0.21                                                                                        | 0.42                                                                                        | 0.40                                                                                        |
| O-BR-I-W2-T3-CW-R3       | Low-quality                         | High-quality                        | 0.26                                                                                        | 0.19                                                                                        | 0.33                                                                                        | 0.36                                                                                        |
| O-BR-I-W2-T4-CW-R4       | Low-quality                         | High-quality                        | 0.62                                                                                        | 0.37                                                                                        | 0.55                                                                                        | 0.54                                                                                        |
| O-AL-I-W4-T1-CW-R1       | Low-quality                         | High-quality                        | 0.60                                                                                        | 0.10                                                                                        | 0.80                                                                                        | 0.87                                                                                        |
| O-AL-I-W4-T2-CW-R2       | Low-quality                         | High-quality                        | 1.14                                                                                        | 0.05                                                                                        | 0.79                                                                                        | 0.74                                                                                        |
| O-AL-I-W4-T3-CW-R3       | High-quality                        | Low-quality                         | 2.31                                                                                        | 1.58                                                                                        | 0.73                                                                                        | 0.75                                                                                        |
| O-AL-I-W5-T3-CW-R3       | High-quality                        | High-quality                        | 2.60                                                                                        | 0.76                                                                                        | 0.76                                                                                        | 0.76                                                                                        |
| O-AL-I-W6-T1-CW-R1       | Low-quality                         | High-quality                        | 1.15                                                                                        | 0.12                                                                                        | 0.23                                                                                        | 0.23                                                                                        |

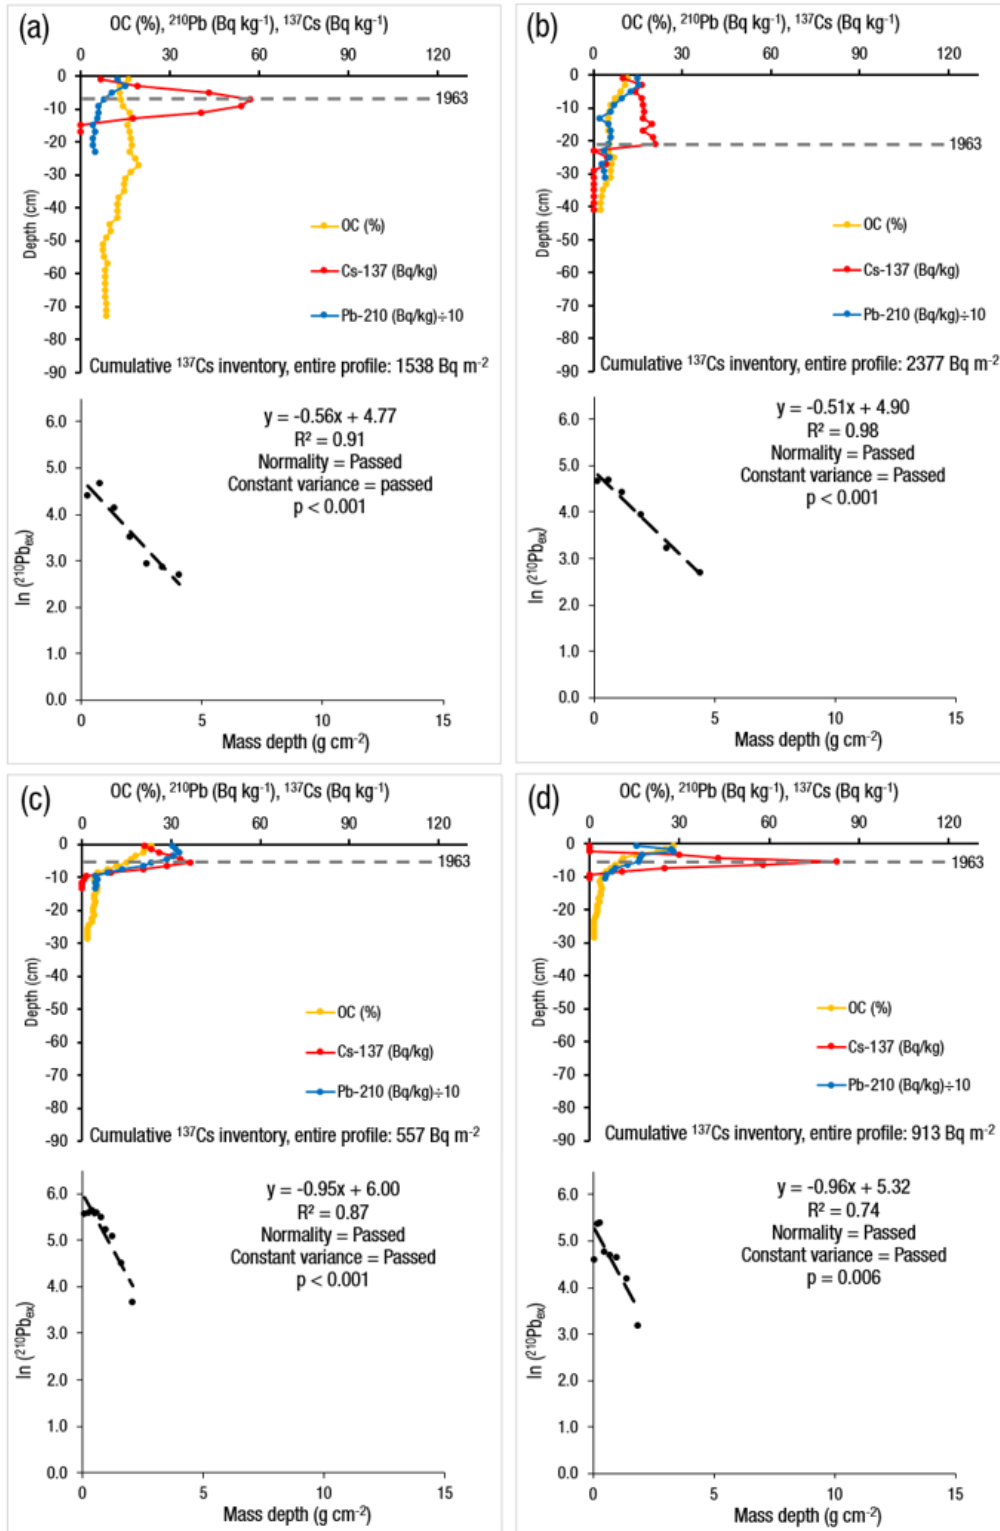

**Figure S1:** Depth distributions of high-quality  $^{137}\text{Cs}$  ( $\text{Bq kg}^{-1}$ ) and high-quality  $^{210}\text{Pb}$  ( $\text{Bq kg}^{-1}$ ) profiles (along with the organic carbon [OC] concentrations [%], cumulative  $^{137}\text{Cs}$  inventory [ $\text{Bq m}^{-2}$ ], and linear plot of log-transformed  $^{210}\text{Pb}_{\text{ex}}$  against mass depth [ $\text{g cm}^{-2}$ ]) based on their classification. The four depth distribution plots are from sediment cores (a) A-WE-I-W2-T3-CW-R3, (b) S-RO-I-W2-T2-CW-R2, (c) S-LO-I-W3-T2-CW-R2, and (d) S-LO-I-W3-T3-CW-R3.

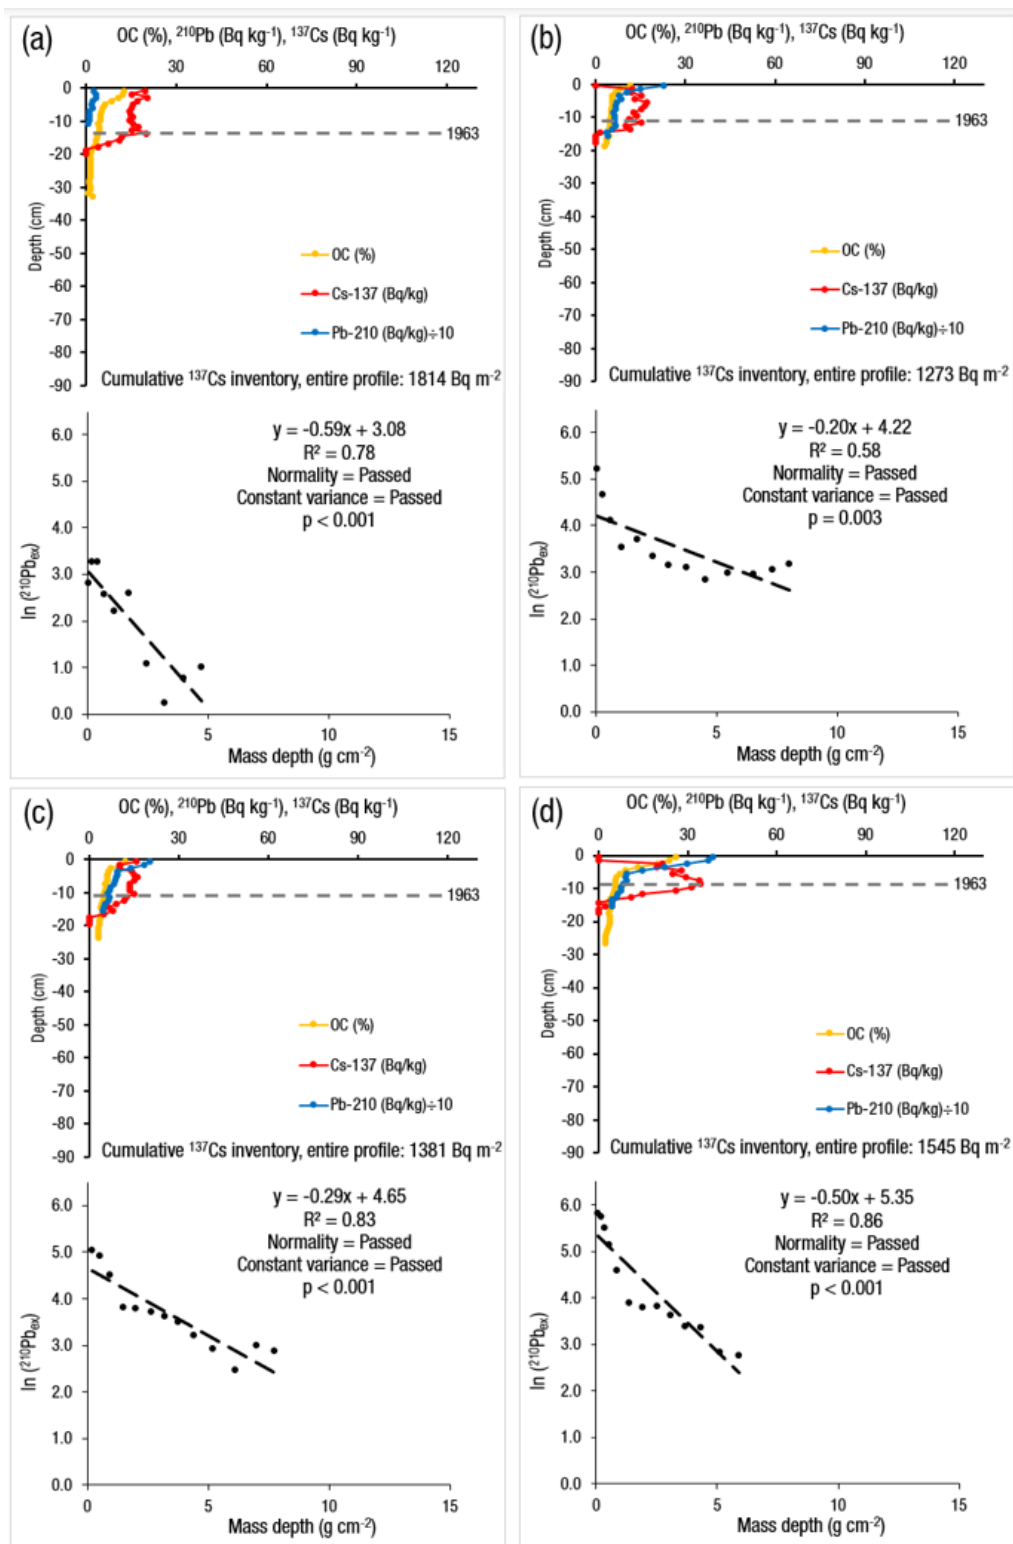

**Figure S2:** Depth distributions of high-quality  $^{137}\text{Cs}$  ( $\text{Bq kg}^{-1}$ ) and high-quality  $^{210}\text{Pb}$  ( $\text{Bq kg}^{-1}$ ) profiles (along with the organic carbon [OC] concentrations [%], cumulative  $^{137}\text{Cs}$  inventory [ $\text{Bq m}^{-2}$ ], and linear plot of log-transformed  $^{210}\text{Pb}_{\text{ex}}$  against mass depth [ $\text{g cm}^{-2}$ ]) based on their classification. The four depth distribution plots are from sediment cores (a) S-LO-I-W4-T2-CW-R2, (b) S-RO-I-W5-T1-CW-R1, (c) S-RO-I-W5-T3-CW-R3, and (d) S-RU-I-W7-T1-CW-R1.

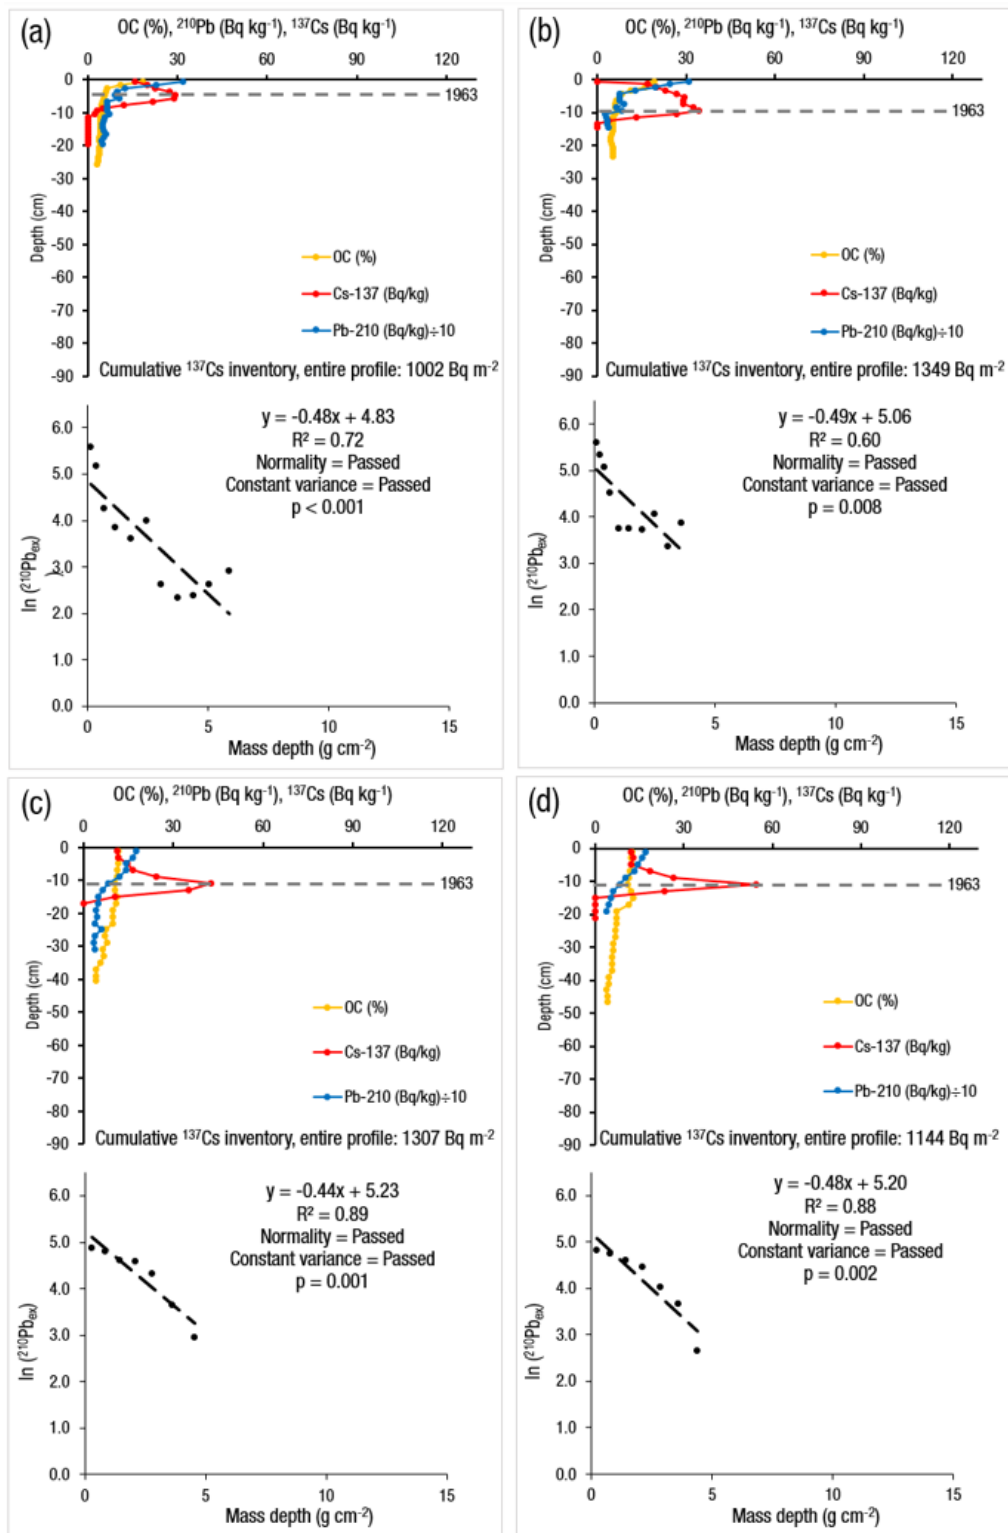

**Figure S3:** Depth distributions of high-quality  $^{137}\text{Cs}$  (Bq kg $^{-1}$ ) and high-quality  $^{210}\text{Pb}$  (Bq kg $^{-1}$ ) profiles (along with the organic carbon [OC] concentrations [%], cumulative  $^{137}\text{Cs}$  inventory [Bq m $^{-2}$ ], and linear plot of log-transformed  $^{210}\text{Pb}_{\text{ex}}$  against mass depth [g cm $^{-2}$ ]) based on their classification. The four depth distribution plots are from sediment cores (a) S-RU-I-W7-T2-CW-R2, (b) S-RU-I-W7-T3-CW-R3, (c) S-FO-I-W8-T2-CW-R2, and (d) S-FO-I-W8-T3-CW-R3.



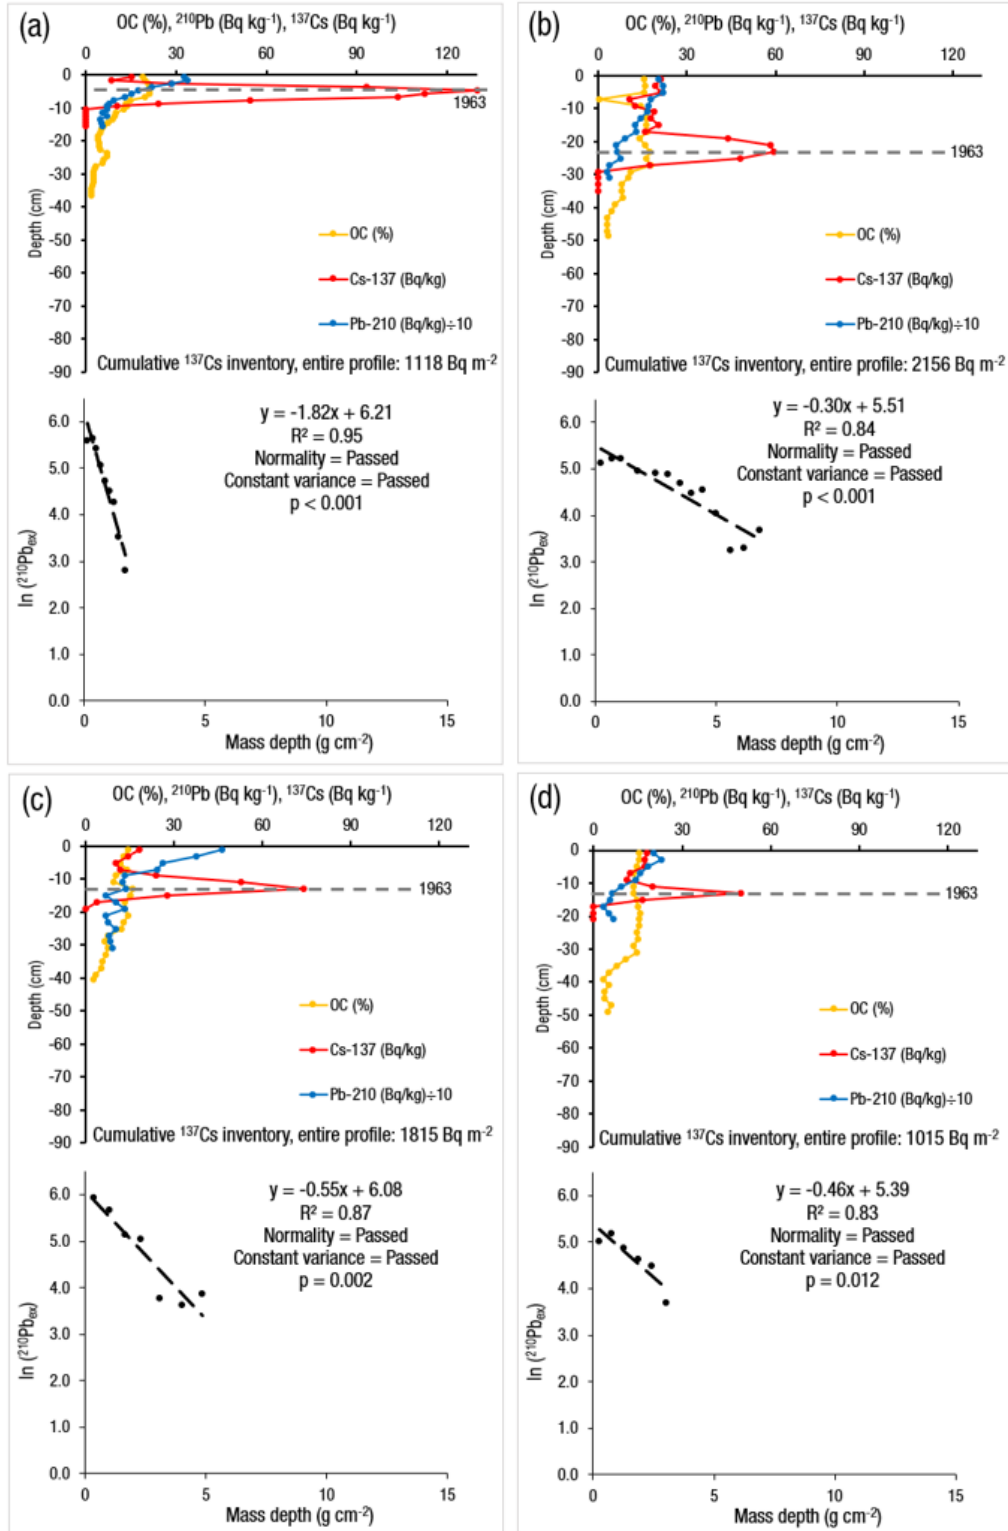

**Figure S4:** Depth distributions of high-quality  $^{137}\text{Cs}$  ( $\text{Bq kg}^{-1}$ ) and high-quality  $^{210}\text{Pb}$  ( $\text{Bq kg}^{-1}$ ) profiles (along with the organic carbon [OC] concentrations [%], cumulative  $^{137}\text{Cs}$  inventory [ $\text{Bq m}^{-2}$ ], and linear plot of log-transformed  $^{210}\text{Pb}_{\text{ex}}$  against mass depth [ $\text{g cm}^{-2}$ ]) based on their classification. The four depth distribution plots are from sediment cores (a) S-FO-I-W9-T2-CW-R2, (b) S-FO-I-W11-T1-CW-R1, (c) S-FO-I-W11-T2-CW-R2, and (d) S-FO-I-W11-T3-CW-R3.

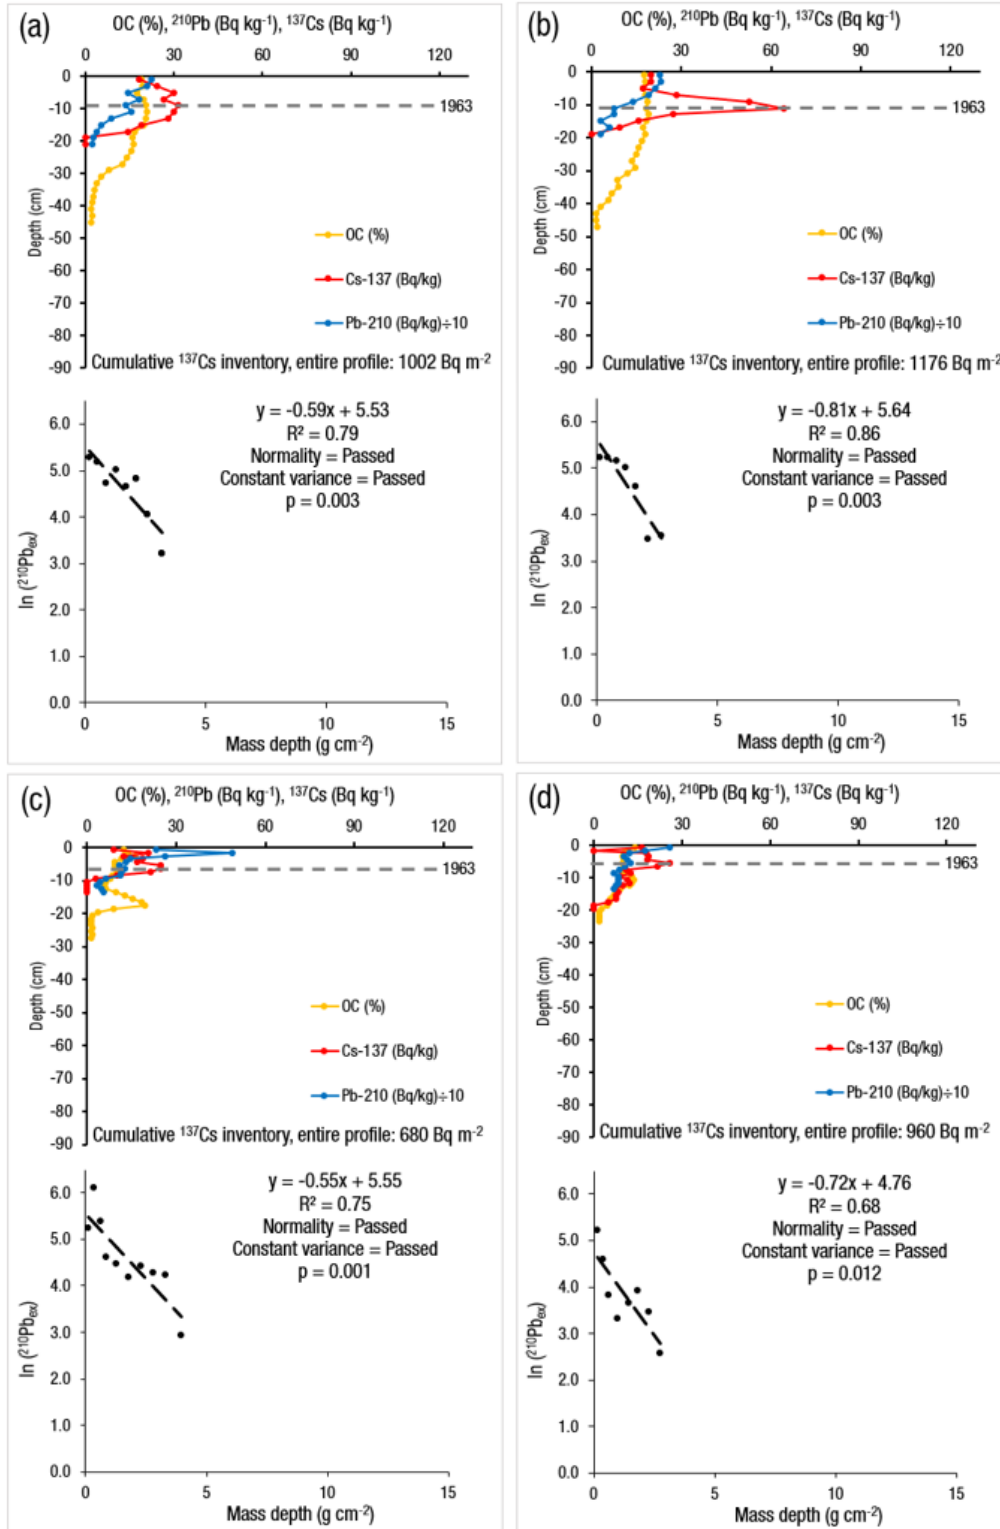

**Figure S5:** Depth distributions of high-quality  $^{137}\text{Cs}$  ( $\text{Bq kg}^{-1}$ ) and high-quality  $^{210}\text{Pb}$  ( $\text{Bq kg}^{-1}$ ) profiles (along with the organic carbon [OC] concentrations [%], cumulative  $^{137}\text{Cs}$  inventory [ $\text{Bq m}^{-2}$ ], and linear plot of log-transformed  $^{210}\text{Pb}_{\text{ex}}$  against mass depth [ $\text{g cm}^{-2}$ ]) based on their classification. The four depth distribution plots are from sediment cores (a) S-FO-I-W12-T1-CW-R1, (b) S-FO-I-W12-T3-CW-R3, (c) S-FO-I-W16-T2-CW-R2, and (d) S-FO-I-W16-T3-CW-R3.

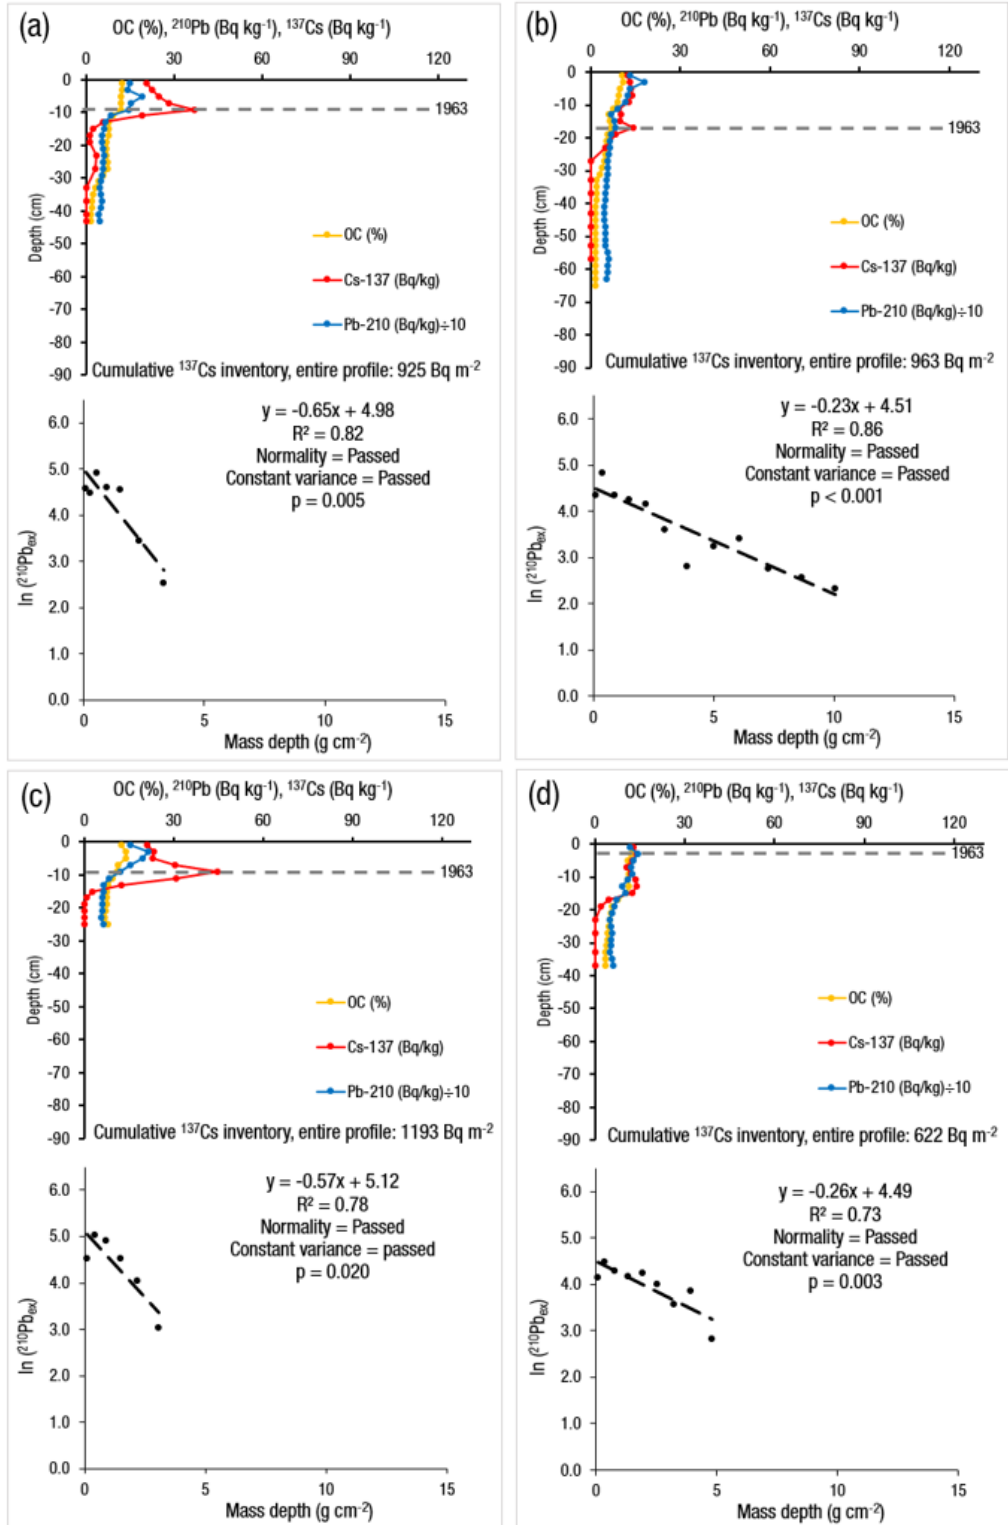

**Figure S6:** Depth distributions of high-quality  $^{137}\text{Cs}$  ( $\text{Bq kg}^{-1}$ ) and high-quality  $^{210}\text{Pb}$  ( $\text{Bq kg}^{-1}$ ) profiles (along with the organic carbon [OC] concentrations [%], cumulative  $^{137}\text{Cs}$  inventory [ $\text{Bq m}^{-2}$ ], and linear plot of log-transformed  $^{210}\text{Pb}_{\text{ex}}$  against mass depth [ $\text{g cm}^{-2}$ ]) based on their classification. The four depth distribution plots are from sediment cores (a) M-OA-I-W1-T1-CW-R1, (b) M-OA-I-W1-T2-CW-R2, (c) M-OA-I-W1-T3-CW-R3, and (d) M-OA-I-W2-T1-CW-R1.

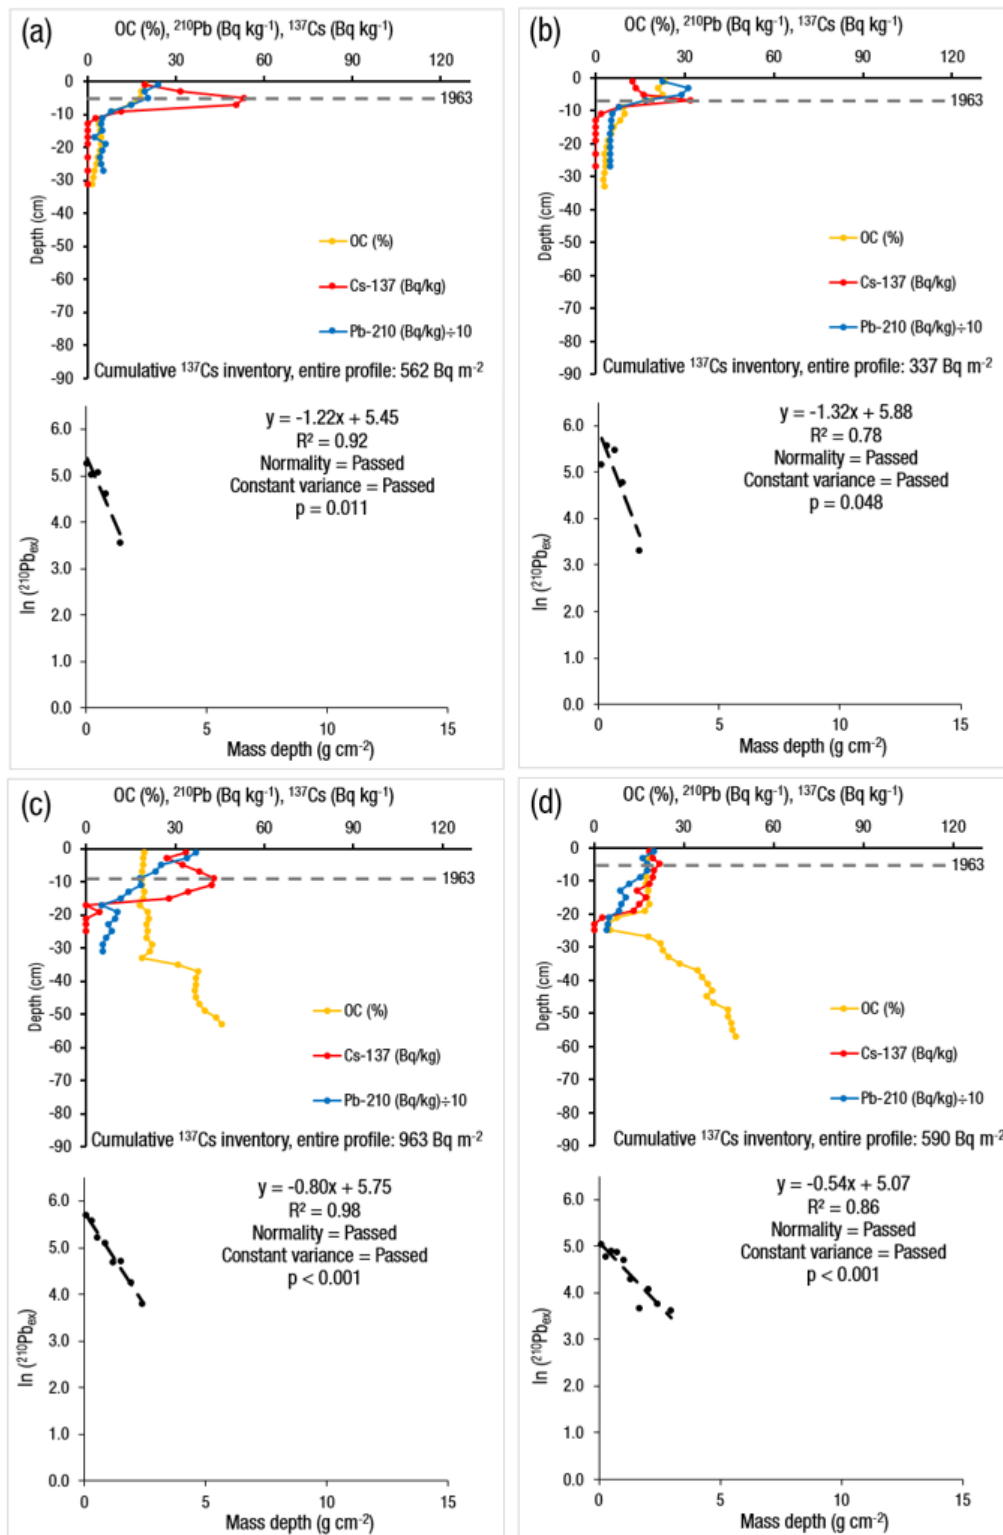

**Figure S7:** Depth distributions of high-quality  $^{137}\text{Cs}$  (Bq kg $^{-1}$ ) and high-quality  $^{210}\text{Pb}$  (Bq kg $^{-1}$ ) profiles (along with the organic carbon [OC] concentrations [%], cumulative  $^{137}\text{Cs}$  inventory [Bq m $^{-2}$ ], and linear plot of log-transformed  $^{210}\text{Pb}_{\text{ex}}$  against mass depth [g cm $^{-2}$ ]) based on their classification. The four depth distribution plots are from sediment cores (a) M-OA-I-W4-T1-CW-R1, (b) M-OA-I-W4-T2-CW-R2, (c) O-BR-I-W1-T2-CW-R2, and (d) O-BR-I-W1-T3-CW-R3.

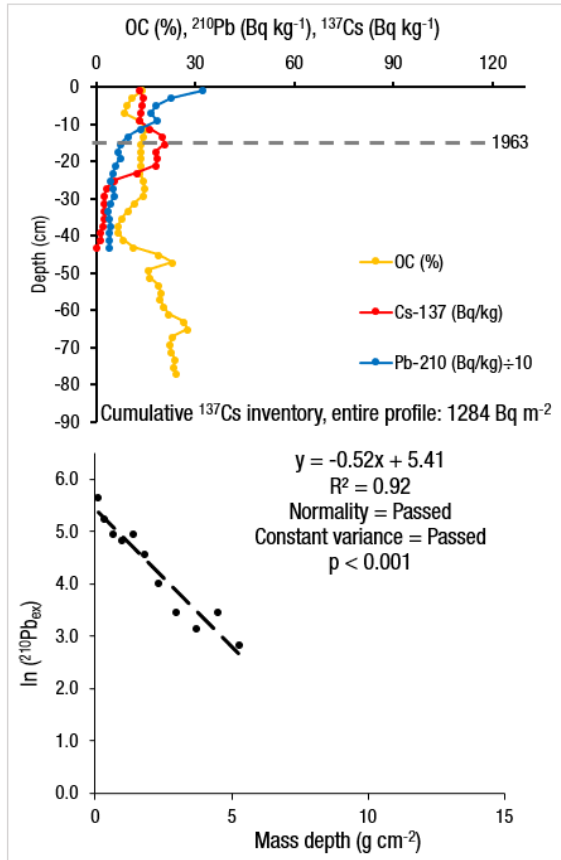

**Figure S8:** Depth distributions of high-quality  $^{137}\text{Cs}$  ( $\text{Bq kg}^{-1}$ ) and high-quality  $^{210}\text{Pb}$  ( $\text{Bq kg}^{-1}$ ) profiles (along with the organic carbon [OC] concentrations [%], cumulative  $^{137}\text{Cs}$  inventory [ $\text{Bq m}^{-2}$ ], and linear plot of log-transformed  $^{210}\text{Pb}_{\text{ex}}$  against mass depth [ $\text{g cm}^{-2}$ ]) based on their classification. The depth distribution plot is from sediment core O-AL-I-W5-T3-CW-R3.

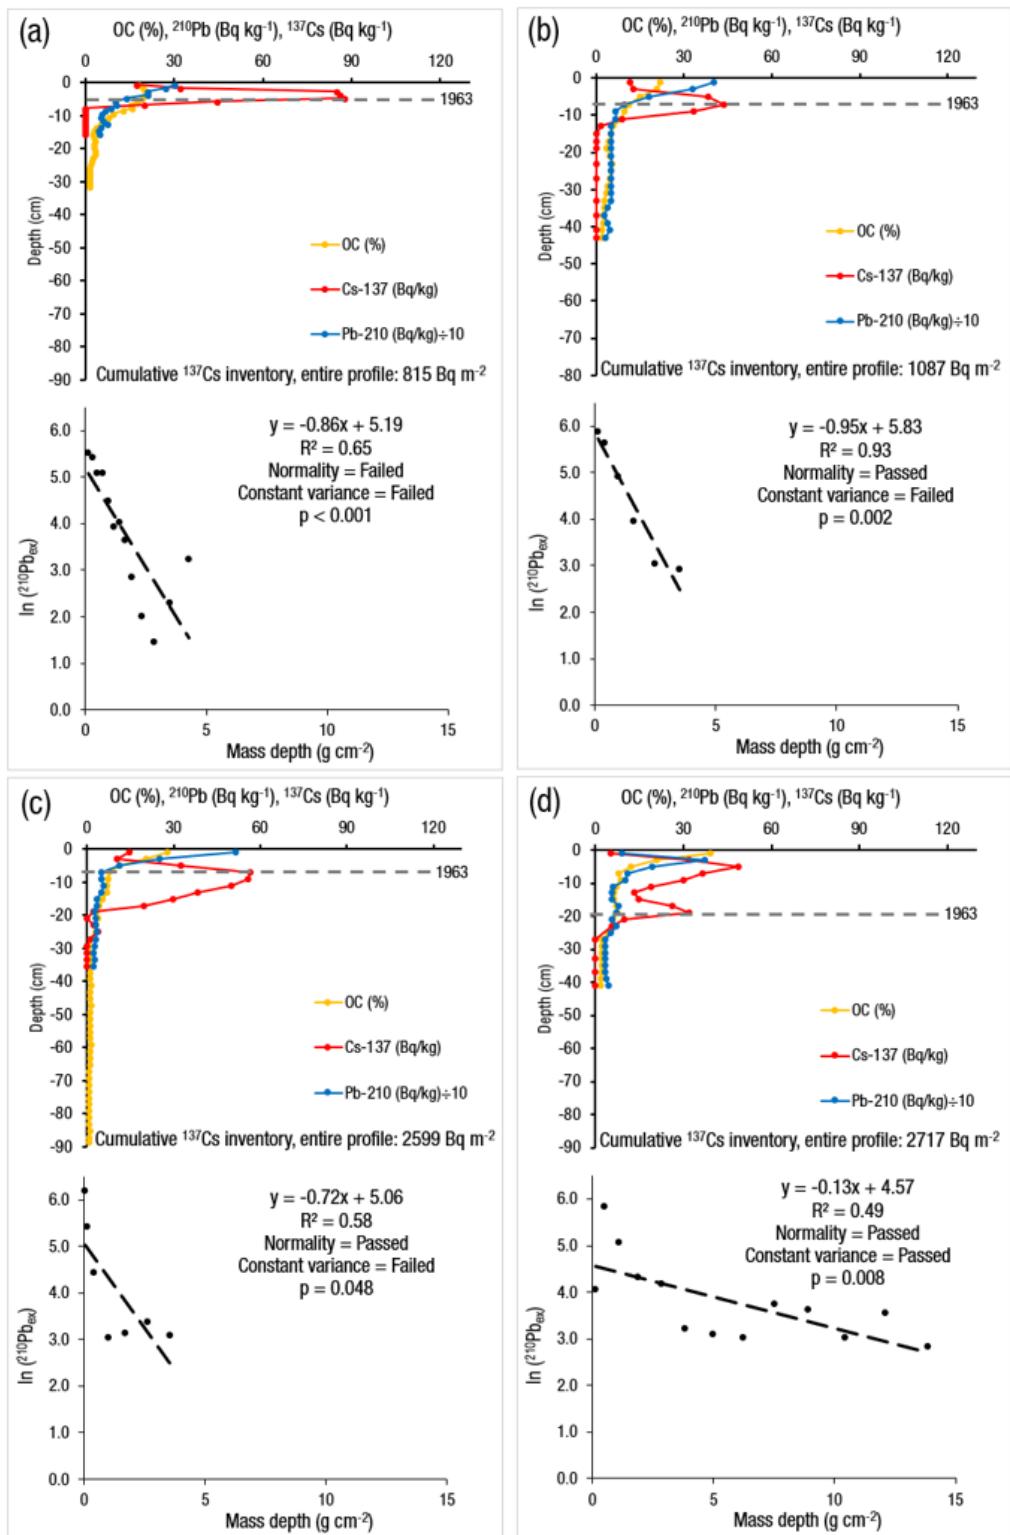

**Figure S9:** Depth distributions of high-quality  $^{137}\text{Cs}$  ( $\text{Bq kg}^{-1}$ ) and low-quality  $^{210}\text{Pb}$  ( $\text{Bq kg}^{-1}$ ) profiles (along with the organic carbon [OC] concentrations [%], cumulative  $^{137}\text{Cs}$  inventory [ $\text{Bq m}^{-2}$ ], and linear plot of log-transformed  $^{210}\text{Pb}_{\text{ex}}$  against mass depth [ $\text{g cm}^{-2}$ ]) based on their classification. The four depth distribution plots are from sediment cores (a) S-FO-I-W9-T3-CW-R3, (b) M-OA-I-W3-T2-CW-R2, (c) M-OA-I-W5-T1-CW-R1, and (d) M-OA-I-W5-T3-CW-R3.

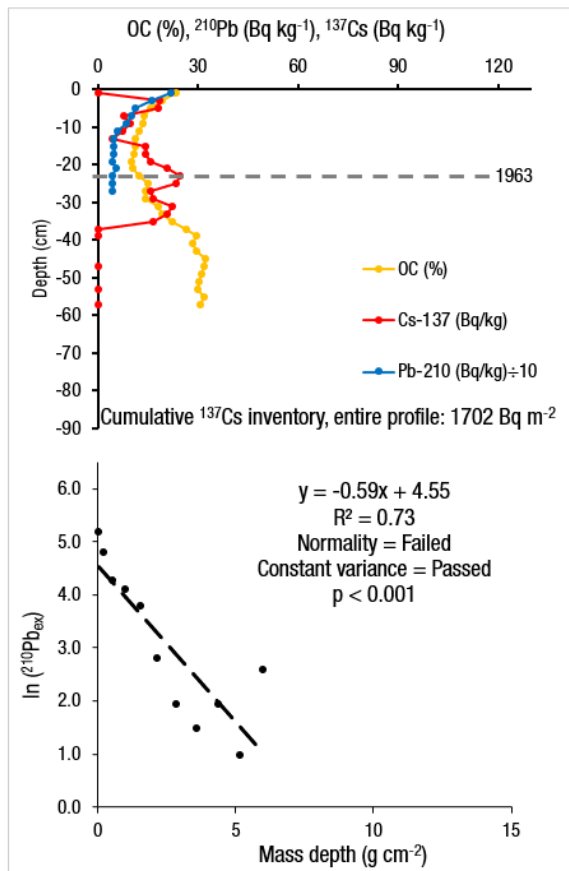

**Figure S10:** Depth distributions of high-quality <sup>137</sup>Cs (Bq kg<sup>-1</sup>) and low-quality <sup>210</sup>Pb (Bq kg<sup>-1</sup>) profiles (along with the organic carbon [OC] concentrations [%], cumulative <sup>137</sup>Cs inventory [Bq m<sup>-2</sup>], and linear plot of log-transformed <sup>210</sup>Pb<sub>ex</sub> against mass depth [g cm<sup>-2</sup>]) based on their classification. The depth distribution plot is from sediment core O-AL-I-W4-T3-CW-R3.

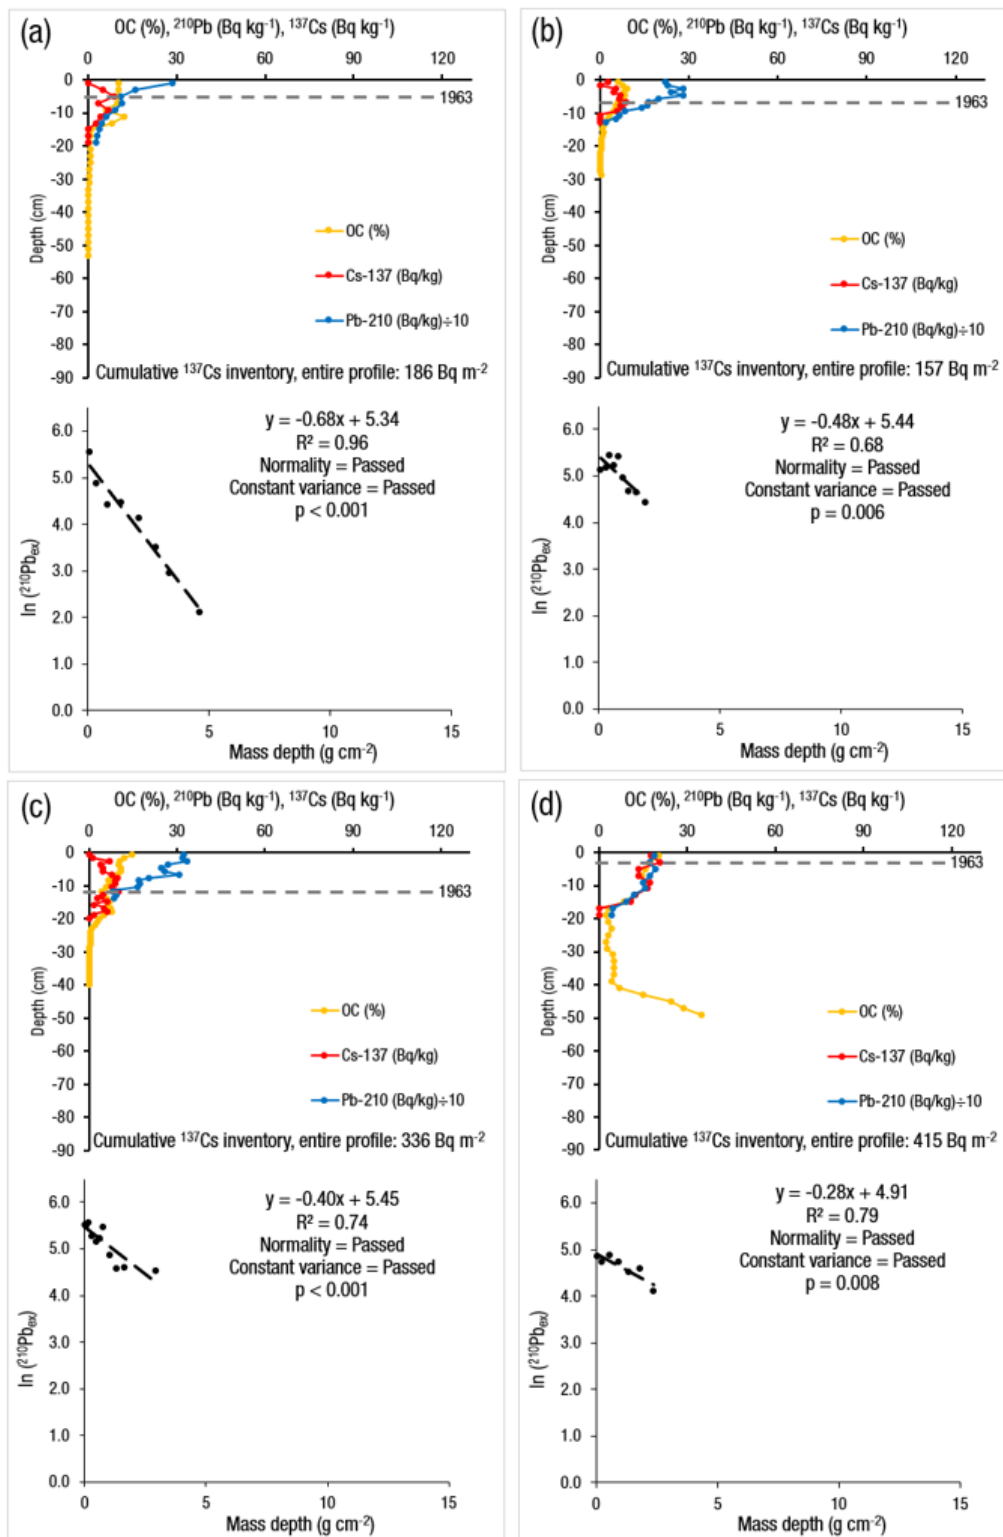

**Figure S11:** Depth distributions of low-quality  $^{137}\text{Cs}$  ( $\text{Bq kg}^{-1}$ ) and high-quality  $^{210}\text{Pb}$  ( $\text{Bq kg}^{-1}$ ) profiles (along with the organic carbon [OC] concentrations [%], cumulative  $^{137}\text{Cs}$  inventory [ $\text{Bq m}^{-2}$ ], and linear plot of log-transformed  $^{210}\text{Pb}_{\text{ex}}$  against mass depth [ $\text{g cm}^{-2}$ ]) based on their classification. The four depth distribution plots are from sediment cores (a) O-BR-I-W2-T2-CW-R2, (b) O-BR-I-W2-T3-CW-R3, (c) O-BR-I-W2-T4-CW-R4, and (d) O-AL-I-W4-T1-CW-R1.



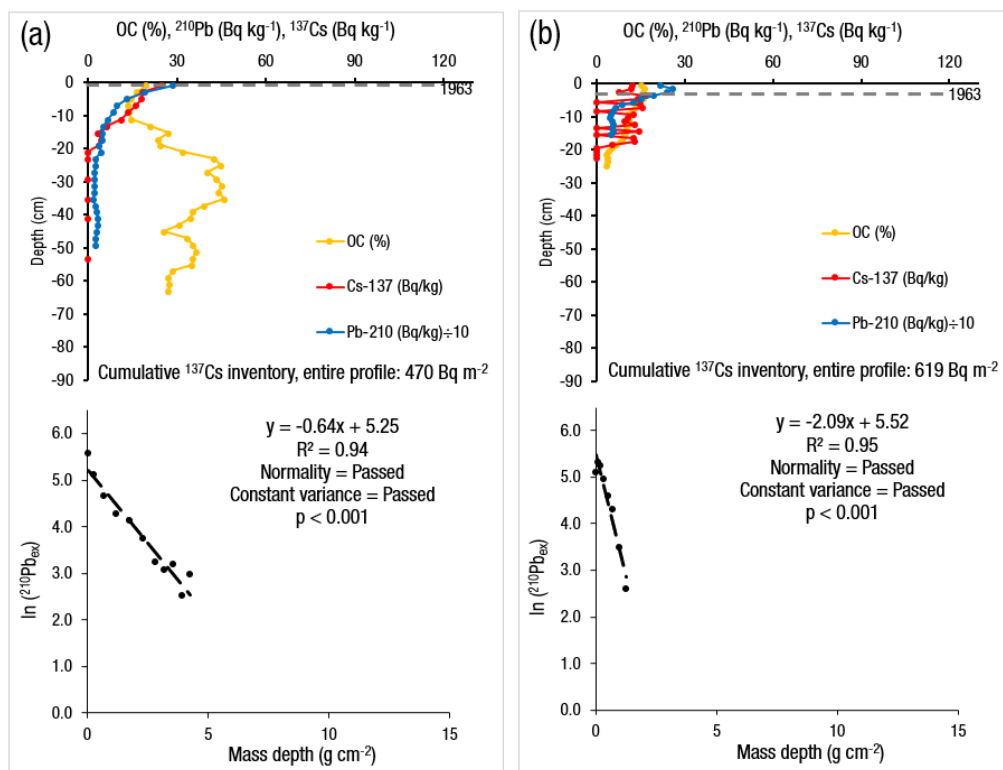

**Figure S12:** Depth distributions of low-quality  $^{137}\text{Cs}$  ( $\text{Bq kg}^{-1}$ ) and high-quality  $^{210}\text{Pb}$  ( $\text{Bq kg}^{-1}$ ) profiles (along with the organic carbon [OC] concentrations [%], cumulative  $^{137}\text{Cs}$  inventory [ $\text{Bq m}^{-2}$ ], and linear plot of log-transformed  $^{210}\text{Pb}_{\text{ex}}$  against mass depth [ $\text{g cm}^{-2}$ ]) based on their classification. The two depth distribution plots are from sediment cores (a) O-AL-I-W4-T2-CW-R2 and (b) O-AL-I-W6-T1-CW-R1.
